# Supplementary material for: Roles of Hsp70s in Stress Responses of Microorganisms, Plants, and Animals
Source: Biomed Res Int. 2015 Nov 16;2015:510319. doi: 10.1155/2015/510319 (PMC4663327; doi:10.1155/2015/510319)
Supplement: Supplementary file 1 — The Supplementary Data summarizes the information of all Hsp70s mentioned in the text, including the gene names, genes locus, cellular localization and so on. [file 510319.f1.xlsx]

## Sheet: Sheet1
Table S1: List the information of all Hsp70 identified in the mentioned kingdoms.
Organisms	Gene names	Gene ID/Locus	Cellular localization	Subfamily	Reference
Escherichia coli	DnaK	AJO81933	Mitochondrion	Hsp70	[5]
Escherichia coli	HscA	EGT66040/Z3793	Cytoplasm	Hsp70	[5]
Escherichia coli	HscC	AIF61517/b0650	Cytoplasm	Hsp70	[5]
Saccharomyces cerevisiae	Ssa1	P10591/YAL005C	Cytoplasm	Hsp70	[6]
Saccharomyces cerevisiae	Ssa2	P10592/YLL024C	Cytoplasm	Hsp70	[6]
Saccharomyces cerevisiae	Ssa3	P09435/YBL075C	Cytoplasm	Hsp70	[6]
Saccharomyces cerevisiae	Ssa4	P22202/YER103W	Cytoplasm	Hsp70	[6]
Saccharomyces cerevisiae	Ssb1	P11484/YDL229W	Cytoplasm	Hsp70	[6]
Saccharomyces cerevisiae	Ssb2	P40150/YNL209W	Cytoplasm	Hsp70	[6]
Saccharomyces cerevisiae	Sse1	P32589/YPL106C	Cytoplasm	Hsp70	[6]
Saccharomyces cerevisiae	Sse2	P32590/YBR169C	Cytoplasm	Hsp70	[6]
Saccharomyces cerevisiae	Ssz1	P38788/YHR064C	Cytoplasm	Hsp70	[6]
Saccharomyces cerevisiae	Ssc1	P0CS90/YJR045C	Mitochondrion	Hsp70	[6]
Saccharomyces cerevisiae	Ecm(ECM10)	NP_010884/YEL030W	Mitochondrion	Hsp70	[6]
Saccharomyces cerevisiae	Ssq(SSQ1)	NP_013473/YLR369W	Mitochondrion	Hsp70	[6]
Chlamydomonas reinhardtii	CreHsp70A	Cre08.g372100	Cytoplasm	Hsp70	[7]
Chlamydomonas reinhardtii	CreHsp70E	Cre16.g677000	Cytoplasm	Hsp70	[7]
Chlamydomonas reinhardtii	CreHsp70B	Cre06.g250100	chloroplast	Hsp70	[7]
Chlamydomonas reinhardtii	Hsp70C	Cre09.g393200	Mitochondrion	Hsp70	[7]
Chlamydomonas reinhardtii	Hsp70D	Cre12.g535700	Mitochondrion	Hsp70	[7]
Chlamydomonas reinhardtii	CreHsp70-BiP1	Cre02.g080700	ER	Hsp70	[7]
Chlamydomonas reinhardtii	CreHsp70-BiP2	Cre02.g080600	ER	Hsp70	[7]
Physcomitrella patens	PpmtHsp70-2	Phpat.001G091000	Mitochondrion	Hsp70	[9]
Physcomitrella patens	PpmtHsp70-3	Phpat.001G091100	Mitochondrion	Hsp70	[9]
Physcomitrella patens	PpmtHsp70-1	Phpat.002G052800	Mitochondrion	Hsp70	[9]
Physcomitrella patens	PpmtHsp70-4	Phpat.002G053100	Mitochondrion	Hsp70	[9]
Physcomitrella patens	PpcpHsp70-1	Phpat.026G035400	chloroplast	Hsp70	[9]
Physcomitrella patens	PpcpHsp70-2	Phpat.004G105700	chloroplast	Hsp70	[9]
Physcomitrella patens	PpcpHsp70-3	Phpat.007G061700	chloroplast	Hsp70	[9]
Oryza sativa	cHsp70-1	Os01g62290	Nuc/cytoplasm	Hsp70	[12]
Oryza sativa	cHsp70-2	Os03g16860	Nuc/cytoplasm	Hsp70	[12]
Oryza sativa	cHsp70-3	Os03g16880	Nuc/cytoplasm	Hsp70	[12]
Oryza sativa	cHsp70-4	Os03g16920	Nuc/cytoplasm	Hsp70	[12]
Oryza sativa	cHsp70-5	Os03g60620	Nuc/cytoplasm	Hsp70	[12]
Oryza sativa	cHsp70-6	Os05g38530	Nuc/cytoplasm	Hsp70	[12]
Oryza sativa	cHsp70-7	Os11g47760	Nuc/cytoplasm	Hsp70	[12]
Oryza sativa	cHsp70-8	Os11g08440	Nuc/cytoplasm	Hsp70	[12]
Oryza sativa	cHsp70-9	Os11g08445	Nuc/cytoplasm	Hsp70	[12]
Oryza sativa	cHsp70-10	Os11g08460	Nuc/cytoplasm	Hsp70	[12]
Oryza sativa	cHsp70-11	Os11g08470	Nuc/cytoplasm	Hsp70	[12]
Oryza sativa	uHsp70-2	Os12g38180	unpredicted	Hsp70	[12]
Oryza sativa	BiP1	Os02g02410	ER	Hsp70	[12]
Oryza sativa	BiP2	Os03g50250	ER	Hsp70	[12]
Oryza sativa	BiP3	Os05g30480	ER	Hsp70	[12]
Oryza sativa	BiP4	Os05g35400	ER	Hsp70	[12]
Oryza sativa	BiP5	Os08g09770	ER	Hsp70	[12]
Oryza sativa	BiP6	Os01g33360	ER	Hsp70	[12]
Oryza sativa	mtHsp70-1	Os02g53420	Mitochondria	Hsp70	[12]
Oryza sativa	mtHsp70-2	Os03g02260	Mitochondria	Hsp70	[12]
Oryza sativa	mtHsp70-3	Os09g31486	Mitochondria	Hsp70	[12]
Oryza sativa	cpHsp70-1	Os05g23740	Chloroplast	Hsp70	[12]
Oryza sativa	cpHsp70-2	Os12g14070	Chloroplast	Hsp70	[12]
Oryza sativa	uHsp70-1	Os01g49430	unpredicted	Hsp70	[12]
Oryza sativa	Hsp110-1	Os01g08560	Cytoplasm	Hsp110/SSE	[12]
Oryza sativa	Hsp110-2	Os02g48110	ER	Hsp110/SSE	[12]
Oryza sativa	Hsp110-3	Os03g11910	Cytoplasm	Hsp110/SSE	[12]
Oryza sativa	Hsp110-4	Os05g08840	Cytoplasm	Hsp110/SSE	[12]
Oryza sativa	Hsp110-5	Os05g51360	ER	Hsp110/SSE	[12]
Oryza sativa	Hsp110-6	Os06g10990	Cytoplasm	Hsp110/SSE	[12]
Oryza sativa	Hsp110-7	Os06g46600	Cytoplasm	Hsp110/SSE	[12]
Oryza sativa	Hsp110-8	Os12g05760	ER	Hsp110/SSE	[12]
Oryza sativa	AtcHsp70-1	AT5G02500.1	Cytoplasm	Hsp70	[12]
Arabidopsis	AtcHsp70-3	AT3G09440.1	Cytoplasm	Hsp70	[13]
Arabidopsis	AtcHsp70-4	AT3G12580.1	Cytoplasm	Hsp70	[13]
Arabidopsis	AtcHsp70-5	AT1G16030.1	Cytoplasm	Hsp70	[13]
Arabidopsis	AtcHsp70-6	AT4G24280.1	Cytoplasm	Hsp70	[13]
Arabidopsis	AtcHsp70-7	AT5G49910.1	Cytoplasm	Hsp70	[13]
Arabidopsis	AtcHsp70-8	AT2G32120.1	Cytoplasm	Hsp70	[13]
Arabidopsis	AtcHsp70-14	AT1G79930.1	Cytoplasm	Hsp110/SSE	[13]
Arabidopsis	AtcHsp70-15	AT1G79920.1	Cytoplasm	Hsp110/SSE	[13]
Arabidopsis	AtcHsp70-16	AT1G11660.1	Cytoplasm	Hsp110/SSE	[13]
Arabidopsis	AtcHsp70-17	AT4G16660.1	Cytoplasm	Hsp110/SSE	[13]
Arabidopsis	AtcHsp70-18	AT1G56410.1	Cytoplasm	Hsp70	[13]
Arabidopsis	AtcpHsp70-1	AT4G24280.1	Chloroplast	Hsp70	[13]
Arabidopsis	AtcpHsp70-2	AT5G49910.1	Chloroplast	Hsp70	[13]
Arabidopsis	AtHsp70-BiP1	AT5G28540.1	ER	Hsp70	[13]
Arabidopsis	AtHsp70-BiP2	AT5G42020.1	ER	Hsp70	[13]
Arabidopsis	AtHsp70-BiP3	AT1G09080.1	ER	Hsp70	[13]
Arabidopsis	AtmtHsp70-1	AT4G37910.1	Mitochondrion	Hsp70	[13]
Arabidopsis	AtmtHsp70-2	AT5G09590.1	Mitochondrion	Hsp70	[13]
Populus trichocarpa	PtcHsp70-1	Potri.010G205800	Cytoplasm	Hsp70	[13]
Populus trichocarpa	PtcHsp70-2	Potri.008G054600	Cytoplasm	Hsp70	[13]
Populus trichocarpa	PtcHsp70-3	Potri.010G205700	Cytoplasm	Hsp70	[13]
Populus trichocarpa	PtcHsp70-4	Potri.008G054700	Cytoplasm	Hsp70	[13]
Populus trichocarpa	PtcHsp70-5	Potri.010G206600	Cytoplasm	Hsp70	[13]
Populus trichocarpa	PtcHsp70-6	Potri.008G054000	Cytoplasm	Hsp70	[13]
Populus trichocarpa	PtcHsp70-7	Potri.001G042700	Cytoplasm	Hsp70	[13]
Populus trichocarpa	PtcHsp70-8	Potri.003G184000	Cytoplasm	Hsp70	[13]
Populus trichocarpa	PtcHsp70-9	Potri.001G042600	Cytoplasm	Hsp70	[13]
Populus trichocarpa	PtcHsp70-10	Potri.008G054900	Cytoplasm	Hsp70	[13]
Populus trichocarpa	PtHsp70-BiP1	Potri.001G087500	ER	Hsp70	[13]
Populus trichocarpa	PtHsp70-BiP2	Potri.003G143600	ER	Hsp70	[13]
Populus trichocarpa	PtHsp70-BiP3	Potri.012G017600	ER	Hsp70	[13]
Populus trichocarpa	PtHsp70-BiP4	Potri.013G018000	ER	Hsp70	[13]
Populus trichocarpa	PtmtHsc70-1	Potri.009G079700	Mitochondrion	Hsp70	[13]
Populus trichocarpa	PtmtHsc70-2	Potri.001G285500	Mitochondrion	Hsp70	[13]
Populus trichocarpa	PtcpHsc70-1	Potri.004G224400	Chloroplast	Hsp70	[13]
Populus trichocarpa	PtcpHsc70-2	Potri.003G006300	Chloroplast	Hsp70	[13]
Populus trichocarpa	PtHsp70t-1	Potri.010G088600	Cytoplasm	Hsp70	[13]
Populus trichocarpa	PtHsp70t-2	Potri.008G152000	Cytoplasm	Hsp70	[13]
Drosophila melanogaster	DmHsp70Aa	Dmel_CG31366	Cytoplasm	Hsp71	[15]
Drosophila melanogaster	DmHsp70Ba	Dmel_CG31449	Cytoplasm	Hsp72	[15]
Drosophila melanogaster	DmHsp70Bb	Dmel_CG31359	Cytoplasm	Hsp73	[15]
Drosophila melanogaster	DmHsp70Bc	Dmel_CG6489	Cytoplasm	Hsp74	[15]
Drosophila melanogaster	DmHsp70Ab	Dmel_CG18743	Cytoplasm	Hsp75	[15]
Drosophila melanogaster	DmHsc70-4	Dmel_CG4264	Cytoplasm	Hsp76	[15]
Drosophila melanogaster	DmHsc70-2	Dmel_CG7756	Cytoplasm	Hsp77	[15]
Drosophila melanogaster	DmHsc70-3	Dmel_CG8937	ER	Hsp78	[15]
Drosophila melanogaster	DmHsc70-5	Dmel_CG8542	Mitochondrion	Hsp79	[15]
Homo sapiens	Hsp70-1	HGNC:5232	Cytoplasm	Hsp80	[50]
Homo sapiens	Hsp70-1t	HGNC:5234	Cytoplasm	Hsp81	[50]
Homo sapiens	Hsp70-2	HGNC:5233	Cytoplasm	Hsp82	[50]
Homo sapiens	Hsp70-5(BiP, GRP78)	HGNC:5238	ER	Hsp83	[50]
Homo sapiens	Hsp70-7(HSP70B)	HGNC:5240	Cytoplasm	Hsp84	[50]
Homo sapiens	Hsp70-8(HSC70, HSC71, HSP73, HSPA10)	HGNC:5241	Cytoplasm	Hsp85	[50]
Homo sapiens	Hsp70-8(GRP75, HSPA9B)	HGNC:5244	Mitochondrion	Hsp86	[50]
